# Supplementary material for: Acute Kidney Failure among Brazilian Agricultural Workers: A Death-Certificate Case-Control Study
Source: MDPI journal article supplement (doi:10.3390/ijerph19116519), 2022-05-27
Supplement: s1 [file s1]

**Supplementary Table S1** - AKF mortality among agricultural workers according to the 10-year birth cohort.

|                          | Cases        | Controls       | OR* (95% CI)      | OR** (95% CI)      |
|--------------------------|--------------|----------------|-------------------|--------------------|
|                          | N (%)        | N (%)          |                   |                    |
| <b><u>Cohort</u></b>     |              |                |                   |                    |
| <b>1920-1929</b>         |              |                |                   |                    |
| Non-Agricultural workers | 1,075 (76.8) | 259,076 (80.6) | 1.00              | 1.00               |
| Agricultural workers     | 325 (23.2)   | 62,249 (19.4)  | 1.26 (1.11-1.43)  | 1.29 (1.12-1.48)   |
| <b>1930-1939</b>         |              |                |                   |                    |
| Non-Agricultural workers | 1,071 (76.8) | 327,654 (81.6) | 1.00              | 1.00               |
| Agricultural workers     | 324 (23.2)   | 73,941 (18.4)  | 1.34 (1.18-1.52)  | 1.37 (1.20-1.57)   |
| <b>1940-1949</b>         |              |                |                   |                    |
| Non-Agricultural workers | 689 (80.4)   | 267,119 (84.0) | 1.00              | 1.00               |
| Agricultural workers     | 168 (19.6)   | 51,008 (16.0)  | 1.28 (1.08 -1.51) | 1.28 (1.07 - 1.55) |
| <b>1950-1959</b>         |              |                |                   |                    |
| Non-Agricultural workers | 467 (87.1)   | 203,297 (86.0) | 1.00              | 1.00               |
| Agricultural workers     | 69 (12.9)    | 32,959 (14.0)  | 0.91 (0.71 -1.17) | 0.94 (0.72 - 1.24) |
| <b>1960-1969</b>         |              |                |                   |                    |
| Non-Agricultural workers | 212 (85.5)   | 132,584 (87.6) | 1.00              | 1.00               |
| Agricultural workers     | 36 (14.5)    | 18,759 (12.4)  | 1.20 (0.84 -1.71) | 1.41 (0.96 - 2.07) |
| <b>1970-1979</b>         |              |                |                   |                    |
| Non-Agricultural workers | 105 (85.4)   | 82,719 (89.6)  | 1.00              | 1.00               |
| Agricultural workers     | 18 (14.6)    | 9,596 (10.4)   | 1.48 (0.90 -2.44) | 1.73 (0.99 - 3.04) |
| <b>1980-1994</b>         |              |                |                   |                    |
| Non-Agricultural workers | 62 (89.9)    | 78,242 (92.5)  | 1.00              | 1.00               |
| Agricultural workers     | 7 (10.1)     | 6,378 (7.5)    | 1.39 (0.63-3.03)  | 1.71 (0.77-3.79)   |

\*Crude odds ratio; \*\*Odds ratio adjusted by all other variables
